# Supplementary material for: 2,6-Dipicolinoylbis(N,N-dialkylthioureas) as versatile building blocks for oligo- and polynuclear architectures
Source: Royal Society of Chemistry journal article supplement (doi:10.1039/c6dt01389a), 2016-01-01
Supplement: c6dt01389a1.pdf [file c6dt01389a1.pdf]

## Supplementary Information to the Paper

### 2,6-Dipicolinoylbis(N,N-dialkylthioureas) as Versatile Building Blocks for Oligo- and Polynuclear Architectures

*Hung Huy Nguyen,<sup>a\*</sup> Jacob Jesudas Jegathesh,<sup>b</sup> Aref Takiden,<sup>b</sup> Dirk Hauenstein,<sup>b</sup> Chien Thang Pham,<sup>b</sup> Canh Dinh Le,<sup>a</sup> and Ulrich Abram<sup>b\*</sup>*

<sup>a</sup> Department of Chemistry, Hanoi University of Science, 19 Le Thanh Tong, Hanoi, Vietnam

<sup>§</sup> Freie Universität Berlin, Institute of Chemistry and Biochemistry, Fabeckstr. 34/36, D-14195 Berlin, Germany

#### 1. X-Ray structure determinations

Fig. S1: Ellipsoid plot of  $[\text{Ni}_2(\text{L}^{\text{a}})_2(\text{MeOH})(\text{H}_2\text{O})]$  (**5**)

Table S1: Selected bond lengths and angles of  $[\text{Ni}_2(\text{L}^{\text{a}})_2(\text{MeOH})(\text{H}_2\text{O})]$  (**5**)

Fig. S2: Ellipsoid plot of  $[\text{Ni}_2\text{Pr}(\text{L}^{\text{a}})_2(\text{OAc})_3(\text{MeOH})_2]$

Table S2: Selected bond lengths and angles in  $[\text{Ni}_2\text{Pr}(\text{L}^{\text{a}})_2(\text{OAc})_3(\text{MeOH})_2]$

Fig. S3: Ellipsoid plot of  $[\text{Ni}_2\text{Ba}(\text{L}^{\text{a}})_3]$

Table S3: Selected bond lengths and angles in  $[\text{Ni}_2\text{Ba}(\text{L}^{\text{a}})_3]$

Fig. S4: Ellipsoid plot of  $\{[\text{Cu}_2\text{Dy}(\text{L}^{\text{a}})_2(\text{p-O}_2\text{C-C}_6\text{H}_4\text{-CO}_2)]\text{Cl}\}$

Table S4: Selected bond lengths and angles in  $\{[\text{Cu}_2\text{Dy}(\text{L}^{\text{a}})_2(\text{p-O}_2\text{C-C}_6\text{H}_4\text{-CO}_2)]\text{Cl}\}$

Fig. S5: Ellipsoid plot of  $[\text{Mn}_2\text{Ba}(\text{MeOH})(\text{L}^{\text{b}})_3]$ .

Table S5: Selected bond lengths and angles in  $[\text{Mn}_2\text{Ba}(\text{MeOH})(\text{L}^{\text{b}})_3]$ .

#### 2. Computational Calculations

Fig. S6: Optimized structure of compound **5**

Table S6: Structural optimization of **5** and comparison with experimental data

Fig. S1: Ellipsoid plot of  $[\text{Ni}_2(\text{L}^{\text{a}})_2(\text{MeOH})(\text{H}_2\text{O})]$  (**5**)

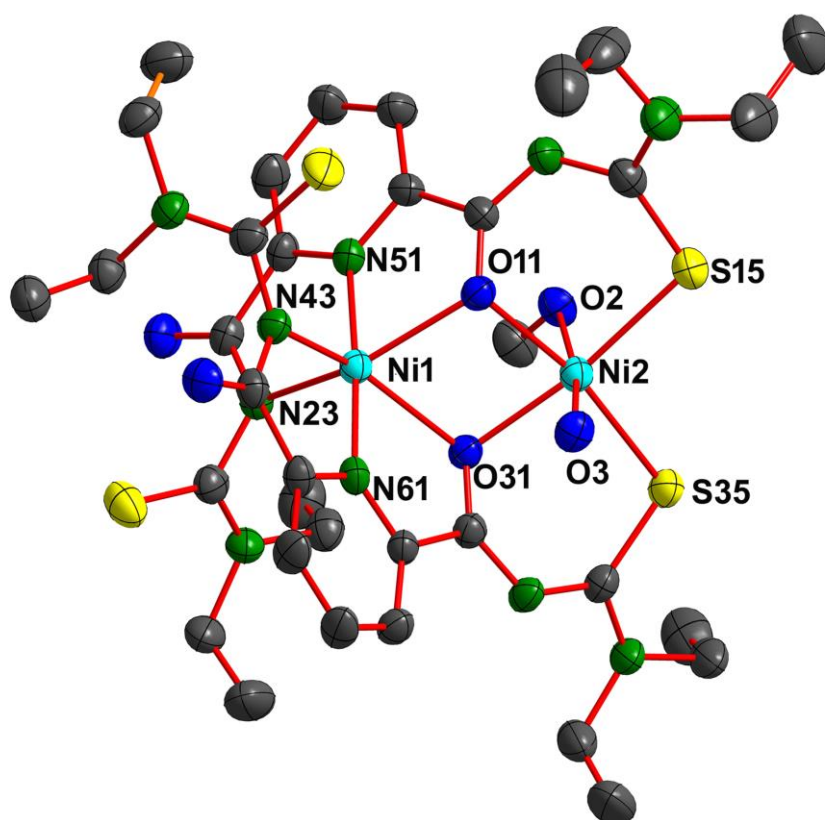

Table S1: Selected bond lengths and angles of  $[\text{Ni}_2(\text{L}^{\text{a}})_2(\text{MeOH})(\text{H}_2\text{O})]$  (**5**)

| Bond lengths (Å) |          |             |          |
|------------------|----------|-------------|----------|
| Ni1–O11          | 2.193(3) | Ni2–O11     | 2.081(3) |
| Ni1–O31          | 2.229(3) | Ni2–O31     | 2.075(3) |
| Ni1–N23          | 2.086(4) | Ni2–S15     | 2.381(1) |
| Ni1–N43          | 2.085(3) | Ni2–S35     | 2.362(1) |
| Ni1–N51          | 1.989(3) | Ni2–O2      | 2.145(3) |
| Ni1–N61          | 1.992(3) | Ni2–O3      | 2.109(3) |
| Angles (°)       |          |             |          |
| O11–Ni1–N23      | 150.0(1) | O11–Ni2–S35 | 168.8(1) |
| O31–Ni1–N43      | 150.6(1) | O31–Ni2–S15 | 172.1(1) |
| N51–Ni1–N61      | 176.4(1) | O2–Ni2–O3   | 170.5(1) |

Fig. S2: Ellipsoid plot of  $[\text{Ni}_2\text{Pr}(\text{L}^{\text{a}})_2(\text{OAc})_3(\text{MeOH})_2]$

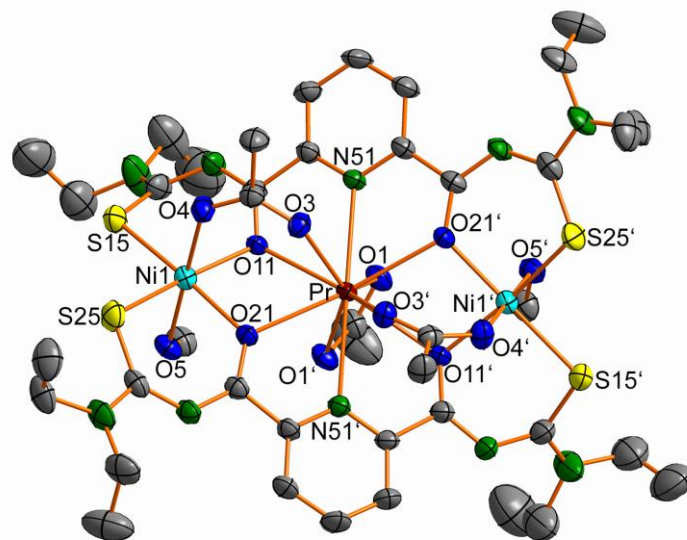

Table S2: Selected bond lengths and angles in  $[\text{Ni}_2\text{Pr}(\text{L}^{\text{a}})_2(\text{OAc})_3(\text{MeOH})_2]$

| Bond lengths (Å)            |           |                           |            |
|-----------------------------|-----------|---------------------------|------------|
| Pr-O1/ O1 <sup>(1)</sup>    | 2.592(2)  | Ni1-O5                    | 2.143(2)   |
| Pr -O3/O3 <sup>(1)</sup>    | 2.437(2)  | Ni1-O11                   | 2.084(2)   |
| Pr -N51/N51 <sup>(1)</sup>  | 2.643(2)  | Ni1-O21 <sup>(1)</sup>    | 2.045(2)   |
| Pr -O11/O11 <sup>(1)</sup>  | 2.580(2)  | Ni1-S15                   | 2.387(1)   |
| Pr -O21/O21 <sup>(1)</sup>  | 2.537(2)  | Ni1-S25 <sup>(1)</sup>    | 2.339(1)   |
| Ni1-O4                      | 2.069(2)  |                           |            |
| Angles (°)                  |           |                           |            |
| O11-Ni1-S25 <sup>(1)</sup>  | 173.12(6) | N51-Ln-N51 <sup>(1)</sup> | 174.71(10) |
| S15- Ni1-O21 <sup>(1)</sup> | 171.27(6) | O11-Ln-O11 <sup>(1)</sup> | 143.83(8)  |
| O5- Ni1-O4                  | 178.57(8) | O21-Ln-O21 <sup>(1)</sup> | 157.92(9)  |

Symmetry codes: <sup>(1)</sup> -x, y, 1/2 -z.

Fig. S3: Ellipsoid plot of  $[\text{Ni}_2\text{Ba}(\text{L}^{\text{a}})_3]$

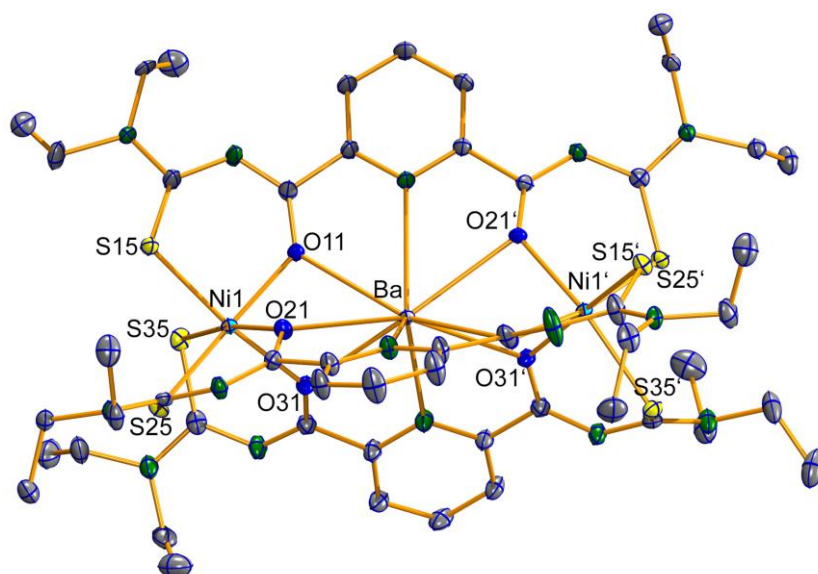

Table S3: Selected bond lengths and angles in  $[\text{Ni}_2\text{Ba}(\text{L}^{\text{a}})_3]$

| Bond lengths (Å)            |           |                           |             |
|-----------------------------|-----------|---------------------------|-------------|
| Ba1-O11/ O11 <sup>(1)</sup> | 2.776(1)  | Ni1-O11                   | 2.072(1)    |
| Ba1-O21/O21 <sup>(1)</sup>  | 2.821(1)  | Ni1-S15                   | 2.381(1)    |
| Ba1-O31/O31 <sup>(1)</sup>  | 2.750(1)  | Ni1-O21 <sup>(1)</sup>    | 2.077(1)    |
| Ba1-N51/N51 <sup>(1)</sup>  | 2.893(2)  | Ni1-S25 <sup>(1)</sup>    | 2.381(1)    |
| Ba1-N61                     | 2.928(3)  | Ni1-O31                   | 2.076(1)    |
| Ba1-Ni1/Ni1 <sup>(1)</sup>  | 3.658(1)  | Ni1-S35                   | 2.457(1)    |
| Angles (°)                  |           |                           |             |
| O31-Ni1-S15                 | 172.12(5) | O5- Ni1-O4                | 168.71(5)   |
| O11- Ni1-S25 <sup>(1)</sup> | 169.97(4) | Ni1-Ba-Ni1 <sup>(1)</sup> | 179.046(10) |

Fig. S4: Ellipsoid plot of  $[\text{Cu}_2\text{Dy}(\text{L}^{\text{a}})_2(\text{p-O}_2\text{C-C}_6\text{H}_4\text{-CO}_2)]^+$

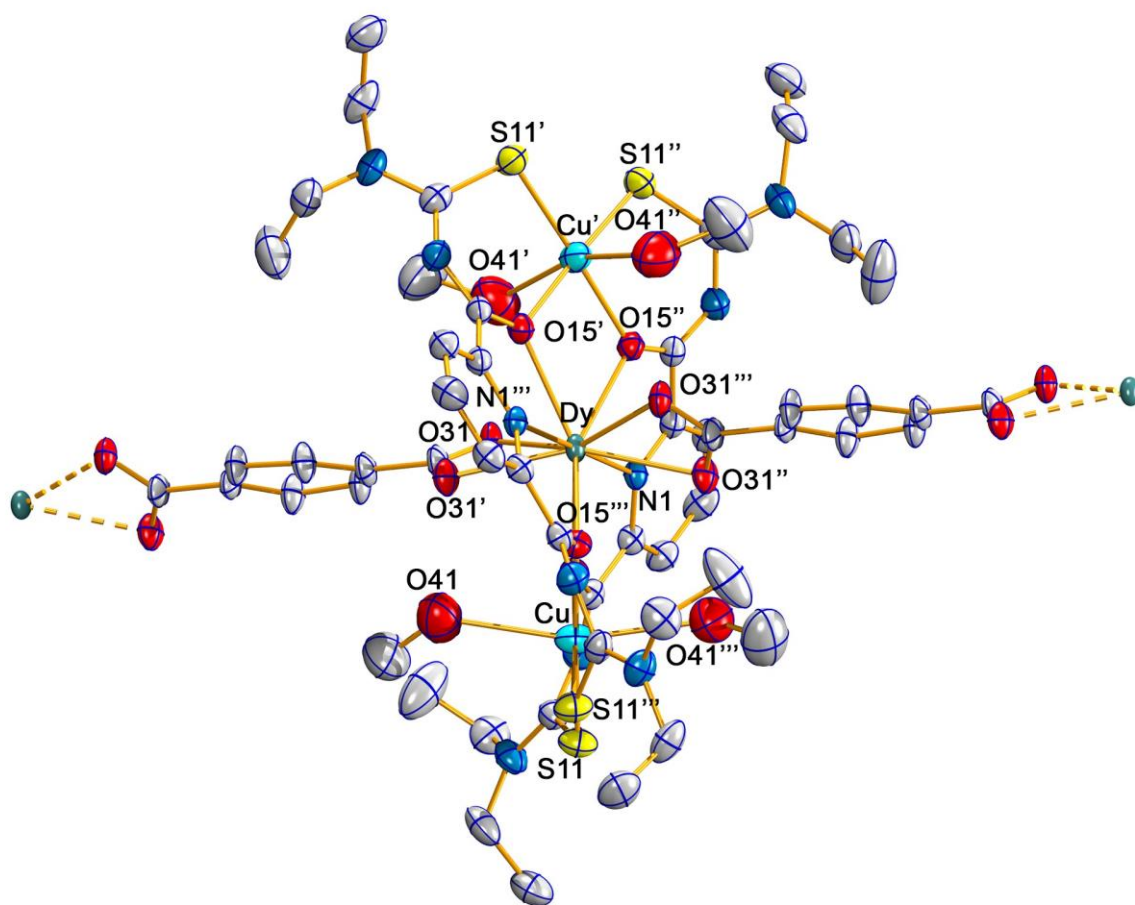

Table S4: Selected bond lengths in  $[\text{Cu}_2\text{Dy}(\text{L}^{\text{a}})_2(\text{p-O}_2\text{C-C}_6\text{H}_4\text{-CO}_2)]^+$

| Bond lengths (Å) |          |        |          |
|------------------|----------|--------|----------|
| Cu-S11           | 2.776(1) | Cu-O41 | 2.072(1) |
| Cu-O15           | 1.989(4) | Dy-O15 | 2.462(4) |
| Dy-N1            | 2.246(2) | Dy-O31 | 2.463(4) |

Fig. S5: Ellipsoid plot of  $[\text{Mn}_2\text{Ba}(\text{MeOH})(\text{L}^b)_3]$

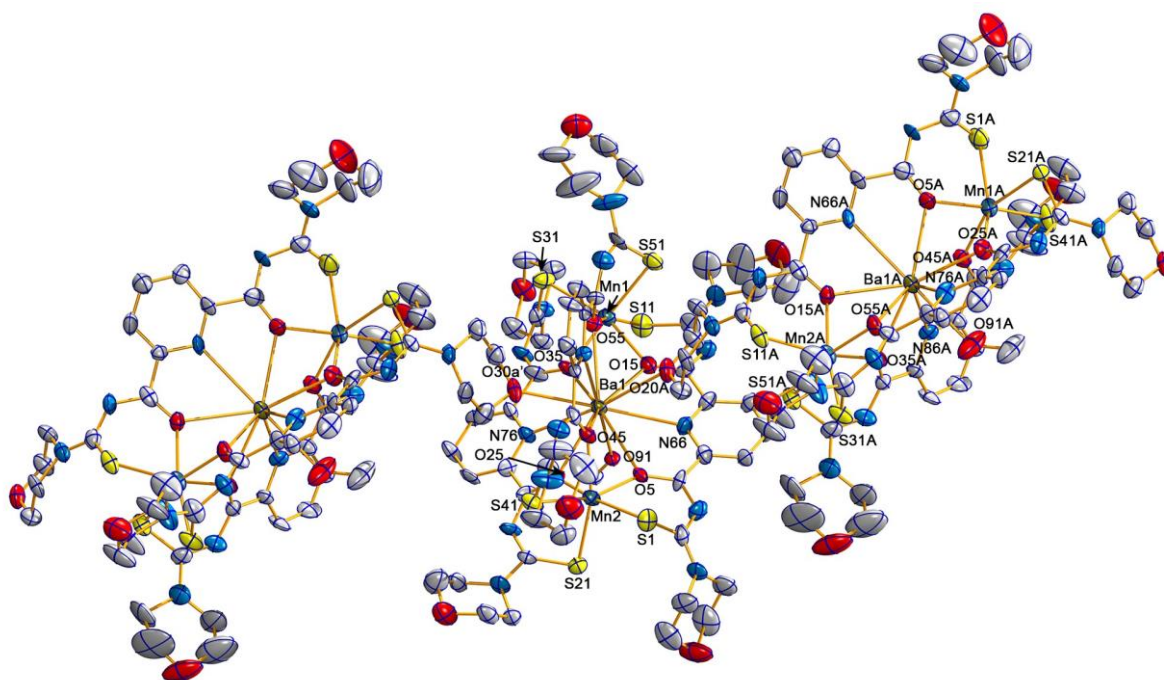

Table S5: Selected bond lengths in  $[\text{Mn}_2\text{Ba}(\text{MeOH})(\text{L}^b)_3]$ .

| Bond lengths (Å)    |                             |                     |                            |
|---------------------|-----------------------------|---------------------|----------------------------|
| Mn1-O15/O35/O55     | 2.155(9)/2.145(9)/2.182(9)  | Ba1-O15/O35/O55     | 2.279(1)/2.775(8)/2.810(9) |
| Mn1-S11/S31/S51     | 2.604(5)/2.579(4)/2.539(5)  | Ba1-N66/N76/N86     | 2.298(1)/3.02(1)/2.98(1)   |
| Mn2-O5/O25/O45      | 2.2146(9)/2.151(9)/2.152(9) | Ba1-O20A/O30a/O91   | 3.09(1)/3.021(9)/3.02(2)   |
| Mn2-S1/S21/S41      | 2.555(4)/2.549(5)/2.554(4)  | Ba1A-O5A/O25A/O45A  | 2.837(9)/2.752(9)/2.78(1)  |
| Mn1A-O5A/O25A/O45A  | 2.147(9)/2.17(1)/2.23(1)    | Ba1A-N66A/N76A/N86A | 3.04(1)/2.90(1)/2.90(1)    |
| Mn1A-S1A/S21A/S41A  | 2.566(5)/2.620(4)/2.523(4)  | Ba1A-O91A           | 2.87(1)                    |
| Mn2A-O15A/O35A/O55A | 2.17(1)/2.201(9)/2.16(1)    |                     |                            |
| Mn2A-S11A/S31A/S51A | 2.585(5)/2.564(5)/2.571(5)  |                     |                            |

Fig. S6: Optimized structure of **5**. Hydrogen atoms bonded to carbon atoms are omitted for clarity.

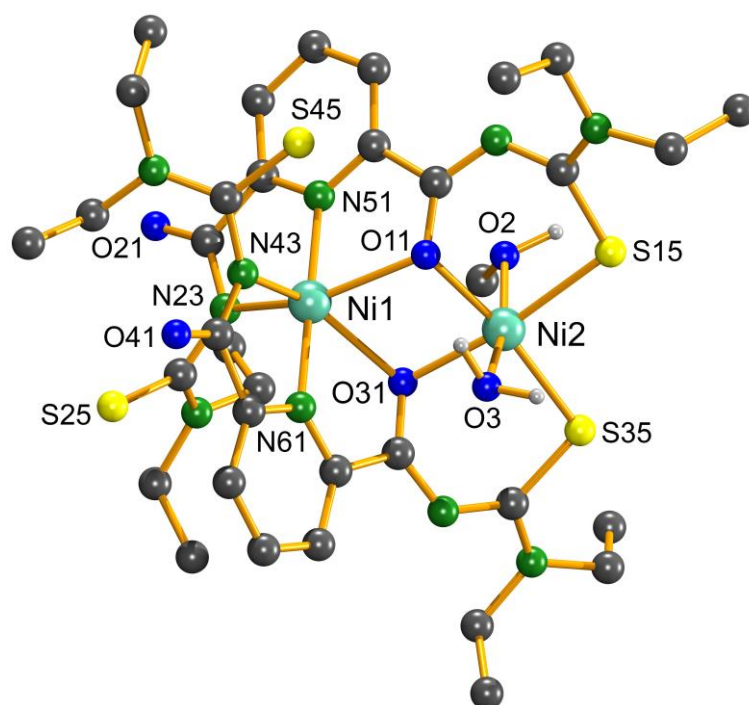

Table S6: Comparison between experimental and calculated data

| Bond lengths (Å) |              |             |
|------------------|--------------|-------------|
| Bonds            | Experimental | Calculated* |
| Ni1–O11          | 2.193(3)     | 2.239(3)    |
| Ni1–O31          | 2.229(3)     | 2.321(3)    |
| Ni1–N23          | 2.086(4)     | 2.086(3)    |
| Ni1–N43          | 2.085(3)     | 2.052(4)    |
| Ni1–N51          | 1.989(3)     | 2.003(8)    |
| Ni1–N61          | 1.992(3)     | 2.006(4)    |
| Ni2–O11          | 2.081(3)     | 2.069(9)    |
| Ni2–O31          | 2.075(3)     | 2.071(6)    |
| Ni2–S15          | 2.381(1)     | 2.416(4)    |
| Ni2–S35          | 2.362(1)     | 2.376(8)    |
| Ni2–O2           | 2.145(3)     | 2.105(2)    |
| Ni2–O3           | 2.109(3)     | 2.117(1)    |
| Angles (°)       |              |             |
| Angles           | Experimental | Calculated* |
| O11–Ni1–N23      | 150.0(1)     | 147.5(4)    |
| O31–Ni1–N43      | 150.6(1)     | 149.1(3)    |
| N51–Ni1–N61      | 176.4(1)     | 179.3(7)    |
| O11–Ni2–S35      | 168.8(1)     | 171.1(2)    |
| O31–Ni2–S15      | 172.1(1)     | 172.1(4)    |
| O2–Ni2–O3        | 170.5(1)     | 168.6(4)    |

\* DFT calculation with PBE1PBE exchange correlation functional with the basis sets LanL2TZ/ 6-311G\*/ 6-311G for Ni/ C, O, N, S/ H atoms, respectively.
